# Supplementary material for: Experimentally designed chemometric models for the assay of toxic adulterants in turmeric powder
Source: RSC Adv. 2022 Mar 23;12(15):9087–94. doi: 10.1039/d2ra00697a (PMC8985183; doi:10.1039/d2ra00697a)
Supplement: RA-012-D2RA00697A-s001 [file RA-012-D2RA00697A-s001.pdf]

### **Supplementary Materials**

**Supplementary Table S1.** Configuration of the genetic algorithms parameters.

| <b>Parameter</b>                                             | <b>Value</b> |
|--------------------------------------------------------------|--------------|
| Population size                                              | 20           |
| Maximum generations                                          | 50           |
| Mutation rate                                                | 0.005        |
| The number of variables in a window (window width)           | 2            |
| Percent of the population the same at convergence            | 50           |
| % Wavelengths used at the initiation                         | 50           |
| Crossover type                                               | Single       |
| Maximum number of latent variables                           | 3            |
| Cross-validation                                             | Random       |
| Number of subsets to divide data into for cross-validation   | 4            |
| Number of iterations for cross-validation at each generation | 2            |

**Supplementary Table S2.** Optimized parameters of the genetic algorithms.

| Parameters | Level code |     |     |
|------------|------------|-----|-----|
|            | -1         | 0   | +1  |
| ml         | 3          | 8   | 13  |
| fit%       | 50%        | 70% | 90% |
| LV         | 4          | 5   | 6   |

**Supplementary Table S3.** Optimized parameters of the artificial neural network.

| Parameters                    | GA(DoE)-ANN <sup>a</sup> |               |               |
|-------------------------------|--------------------------|---------------|---------------|
|                               | Metanil yellow           | Acid orange 7 | Lead chromate |
| Hidden neurons number         | 3-20                     |               |               |
| Transfer functions            | Purelin–Purelin          |               |               |
| Training function             | TRAINLM                  |               |               |
| Learning coefficient          | 0.001                    |               |               |
| Learning coefficient decrease | 0.001                    |               |               |
| Learning coefficient increase | 100                      |               |               |

<sup>a</sup> Artificial neural network using the optimized genetic algorithm

**Supplementary Table S4.** ANOVA results of the optimized genetic algorithm-partial least square model.

|                          | Metanil yellow |          |                 | Acid orange 7 |          |                 | Lead chromate |          |                 |
|--------------------------|----------------|----------|-----------------|---------------|----------|-----------------|---------------|----------|-----------------|
|                          | F-value        | p-value  | Conclusion      | F-value       | p-value  | Conclusion      | F-value       | p-value  | Conclusion      |
| Model                    | 100.87         | < 0.0001 | Significant     | 21.49         | < 0.0001 | Significant     | 85.67         | < 0.0001 | Significant     |
| Lack of fit              | 1.96           | 0.2975   | Not significant | 7.34          | 0.0638   | Not significant | 3.00          | 0.1981   | Not significant |
| Adjusted R <sup>2</sup>  |                | 0.9836   |                 |               | 0.7321   |                 |               | 0.9186   |                 |
| Predicted R <sup>2</sup> |                | 0.8885   |                 |               | 0.5801   |                 |               | 0.8697   |                 |
| Adequate Precision       |                | 25.0838  |                 |               | 8.2623   |                 |               | 16.5482  |                 |

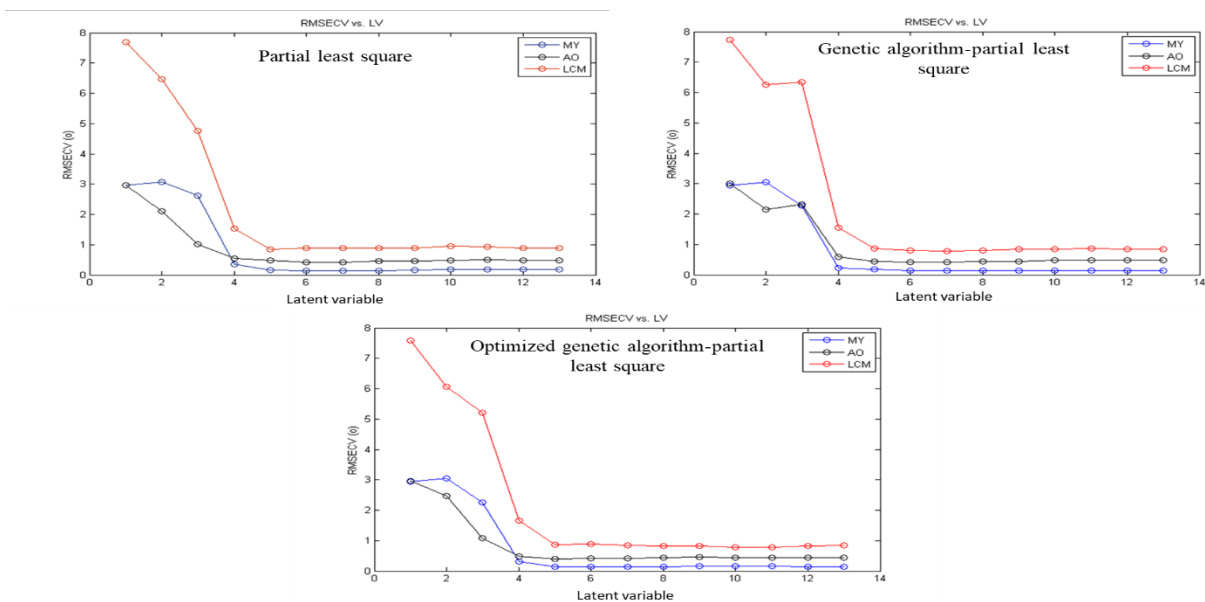

**Supplementary Figure S1.** RMSECV plot of the cross-validation results of the calibration set as a function of the number of principal components used to construct the proposed models.

\*MY: metanil yellow, AO: acid orange 7, LCM: lead chromate.

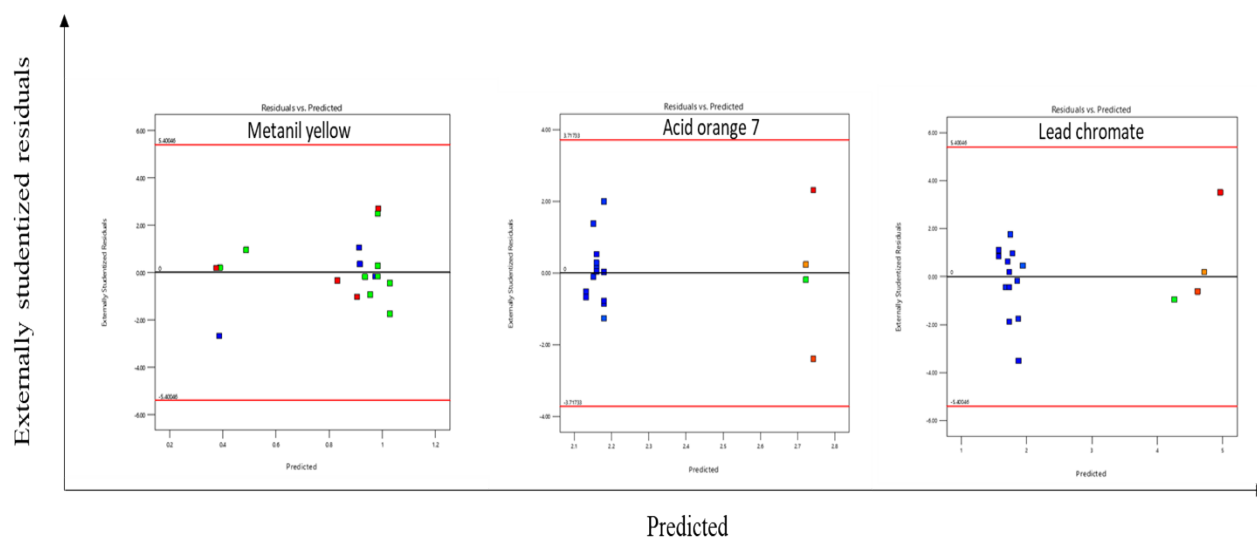

**Supplementary Figure S2.** Residuals versus predicted data of the standard deviation of the concentration of metanil yellow, acid orange 7 and lead chromate in the optimized genetic algorithm-partial least square (GA(DoE)-PLS) model.

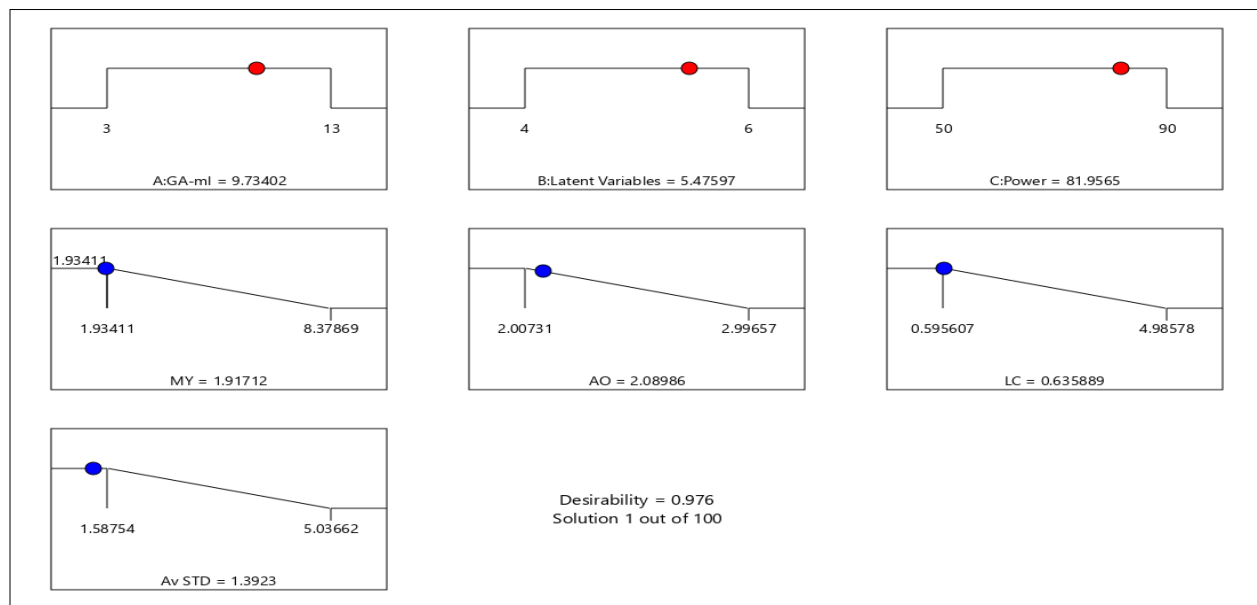

**Supplementary Figure S3.** Numerical optimization of the three adulterants in optimized genetic algorithm-partial least square (GA(DoE)-PLS) model.

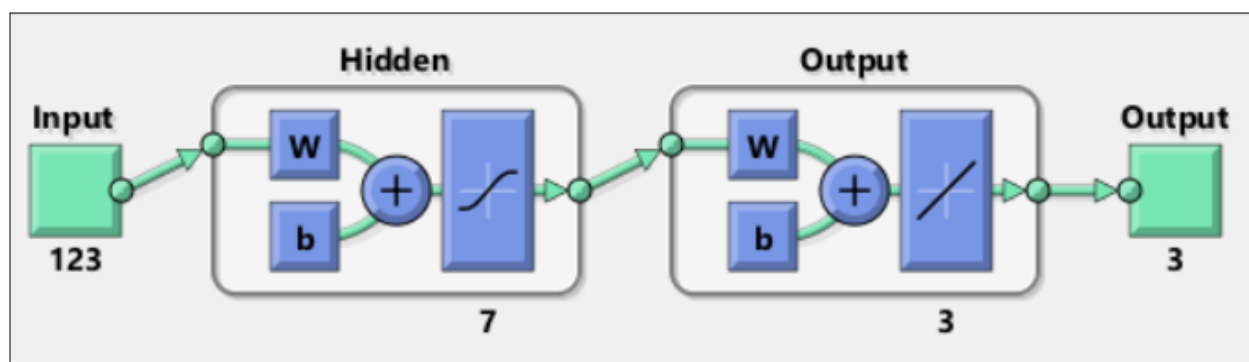

**Supplementary Figure S4.** Artificial neural network architecture uses different layers for the prediction of the concentrations of the three adulterants.

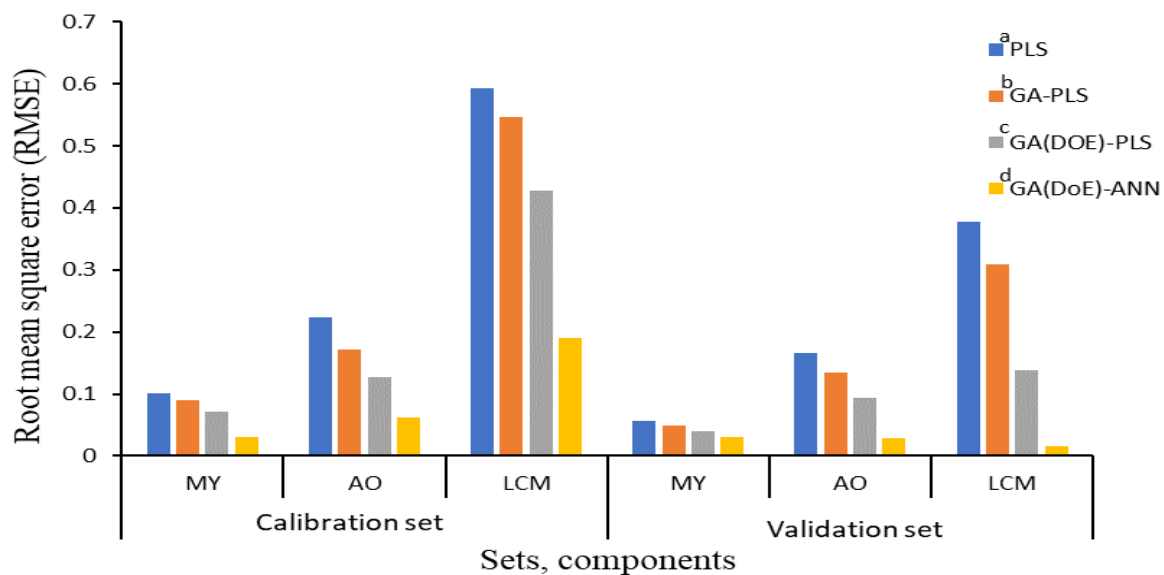

**Supplementary Figure S5.** Root mean square error of calibration and validation sets for the three adulterants using the four chemometric models.

<sup>a</sup> Partial least square, <sup>b</sup> Genetic algorithm-partial least square, <sup>c</sup> Optimized genetic algorithm-partial least square,

<sup>d</sup> Artificial neural network using optimized genetic algorithm, MY: metanil yellow, AO: acid orange 7, LCM: lead chromate.

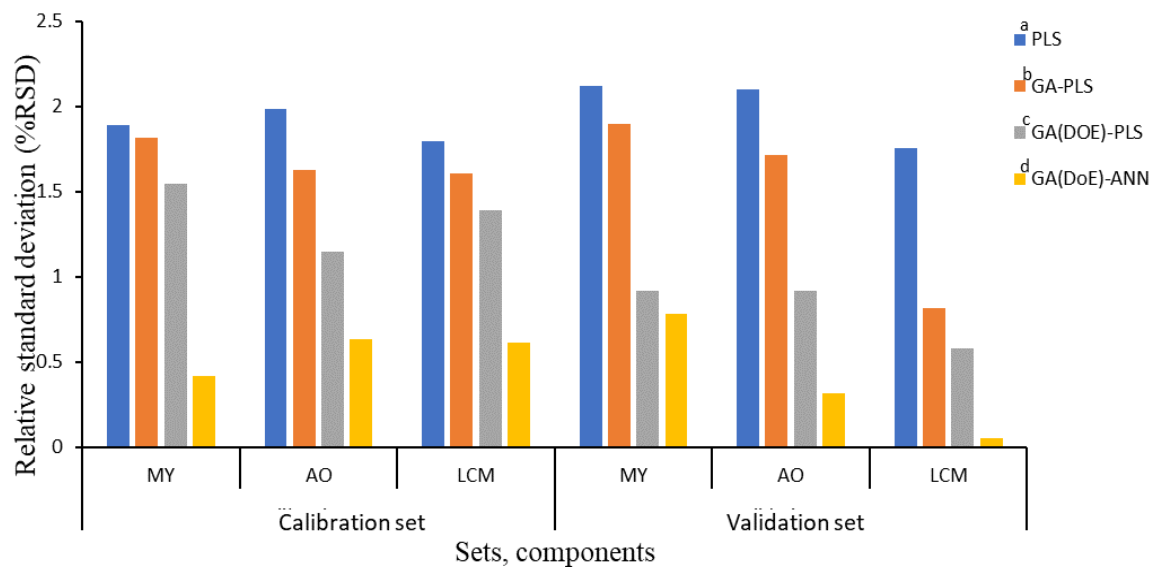

**Supplementary Figure S6.** The relative standard deviation of calibration and validation sets for the three adulterants using the four chemometric models.

<sup>a</sup> Partial least square, <sup>b</sup> Genetic algorithm-partial least square, <sup>c</sup> Optimized genetic algorithm-partial least square, <sup>d</sup> Artificial neural network using optimized genetic algorithm, MY: metanil yellow, AO: acid orange 7, LCM: lead chromate.
